# Supplementary material
Source: publisher site journal article supplement (https://www.spandidos-publications.com/1392/downloadSupplementary)

Figure S1. (A and B) Upregulated or downregulated miR-638 did not affect the expression of AKT mRNA.

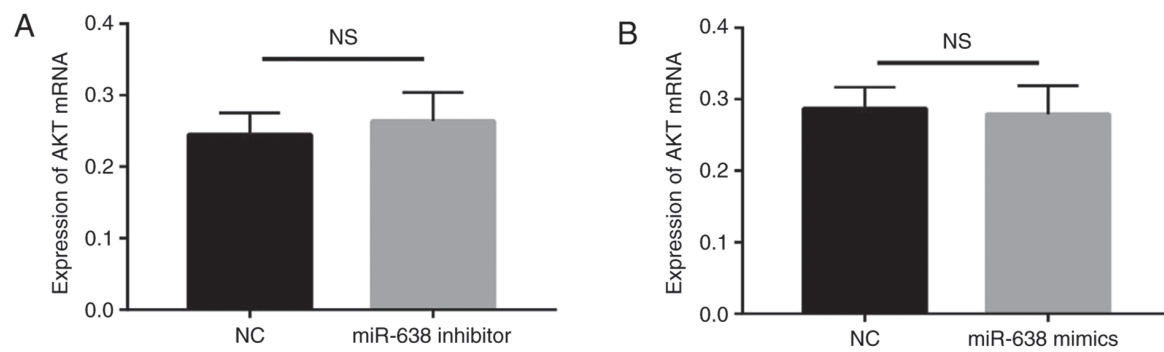

Supplement: Supplementary file 1 [file downloadSupplementary]
